# Supplementary material for: Autogenic vs Subsidence Controls on Grain Size Fining through Multi-Channel Landscape Evolution Modelling
Source: Copernicus journal article supplement (doi:10.5194/egusphere-2024-351), 2024-02-21
Supplement: Supplementary file 1 [file egusphere-2024-351-supplement.zip]

Archive with 4 entries (4 files):
- Paper1SupplementaryAwild/ChannelMobilityBasinVideo.mov
- Paper1SupplementaryAwild/FanStrataAgesFinal.mov
- Paper1SupplementaryAwild/GrainSizeCyclicity.mov
- Paper1SupplementaryAwild/SupplementaryFigureswithDescriptions_Wildetal2024.pdf
